# Supplementary material for: Bandgap recovery of monolayer MoS2 using defect engineering and chemical doping
Source: Royal Society of Chemistry journal article supplement (doi:10.1039/d1ra02888j), 2021-01-01
Supplement: d1ra02888j1.pdf [file d1ra02888j1.pdf]

Electronic Supplementary Information

**Bandgap Recovery of Monolayer MoS<sub>2</sub> using Defect Engineering and Chemical Doping**

*Frederick Aryeetey Sajedeh Pourianejad, Olubukola Ayanbaj, a Kyle Nowlin, Tetyana*

*Ignatova\*, and Shyam Aravamudhan\**

**MoS<sub>2</sub> characterization and analysis**

Photoluminescence (PL) and Raman spectra were recorded with a Horiba XploRa Confocal Raman Microscope at 532 nm of excitation. The two prominent Raman peaks located around 402 cm<sup>-1</sup> and 383 cm<sup>-1</sup> assigned to the out-of-plane (A<sub>1g</sub>) and in-plane (E<sub>2g</sub>) phonon vibration modes respectively (Figure S1c). The exact position of these peaks can be found by fitting with the Lorentz function. The band separation  $\Delta f = 19\text{-}20\text{ cm}^{-1}$  corresponds to 1L MoS<sub>2</sub>. With the increasing number of layers, the difference  $\Delta f$  will also increase, for instance,  $\Delta f = 21\text{-}22\text{ cm}^{-1}$  corresponds to bilayer of MoS<sub>2</sub>. Raman mapping show spatial homogeneity of E<sub>2g</sub> (Figure S1a) and A<sub>1g</sub> (Figure S1b) over the MoS<sub>2</sub> flake area: the intensity and variation for both peaks were negligible, we have identified as grown flakes as pristine monolayers.

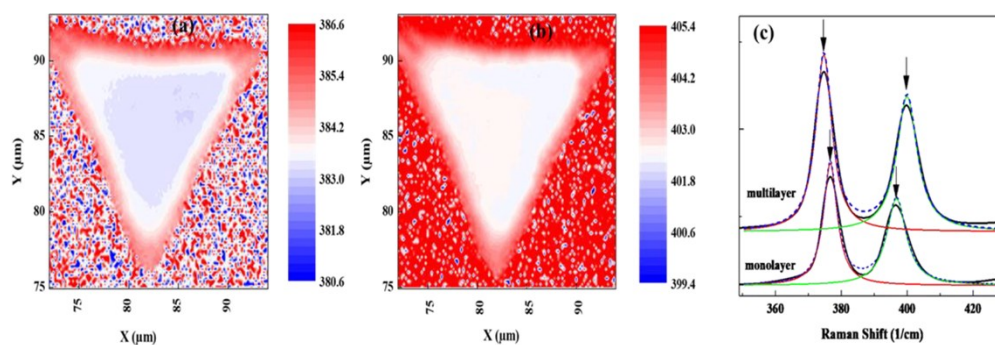

Figure S1 Raman intensity map: (a) E<sub>2g</sub> at 383 cm<sup>-1</sup>, and (b) A<sub>1g</sub> at 402 cm<sup>-1</sup>; (c) Raman spectrum from the center of MoS<sub>2</sub> flake.

MoS<sub>2</sub> samples were irradiated in a Zeiss Helium Ion Microscope operating at accelerating voltage of 30kV with doses 10E13 – 10E16 He<sup>+</sup> ions / cm<sup>2</sup>. For defected samples there are two shoulders: (around 362 cm<sup>-1</sup>) on the left of E<sub>2g</sub> mode and one (around 415 cm<sup>-1</sup>) to the right of A<sub>1g</sub> mode, which are assigned as defect modes. Both peaks were significantly enhanced upon increase of irradiation dose, confirming the introduction of defects (Figure S2).

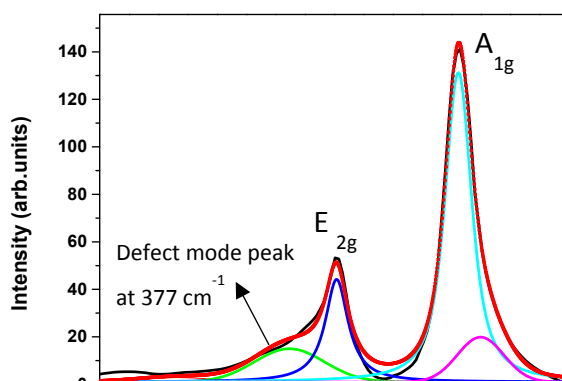

Figure S2: fitting of Raman spectrum MoS<sub>2</sub> sample irradiated with 10E14 dose.

The MoS<sub>2</sub> PL spectra contains three contributions: B-exciton at 1.96 eV, A-exciton at 1.82 eV, and trion (X<sup>-</sup>) at 1.76 eV. We used Gauss function to extract position and intensity of trion peak as it shown on Figure S3.

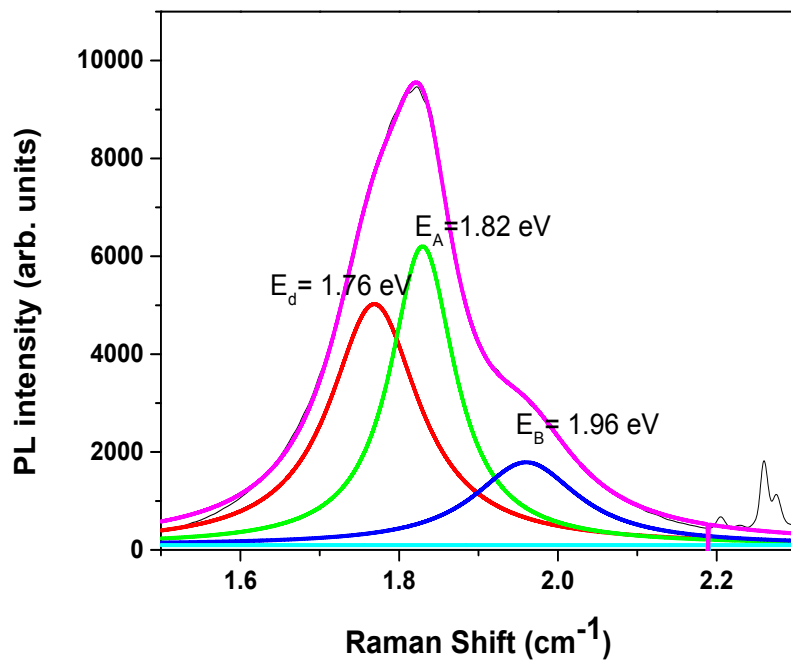

Figure S3: PL of MoS<sub>2</sub>

Atomic force microscopy was used to study topography of treated MoS<sub>2</sub> sample (Figure S4). According to our previous research [S1] the inter-defect distance for 10E14 dose is 10 nm.

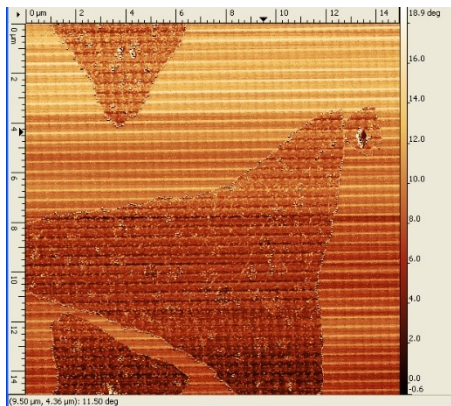

Figure S4: AFM topography and phase of irradiated MoS<sub>2</sub> sample

Attachment of F4TCNQ molecules was verified with TEM (Figure S5)

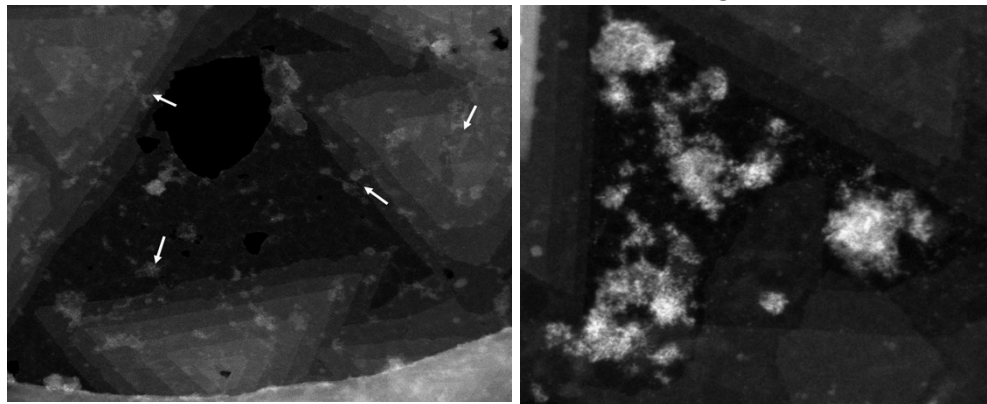

*Figure S5: Transmission Electron Microscopy of F4TCNQ molecule on 2D MoS<sub>2</sub>*

#### **References:**

[S1] F. Aryeetey, T. Ignatova and S. Aravamudhan, Quantification of defects engineered in single layer MoS<sub>2</sub>, *RSC Advances*, 2020, **10**, 22996–23001.
